# Supplementary material for: Understanding the Gangotri glacier dynamics: Implications from a fully distributed inversion of equivalent water-volume change
Source: Copernicus journal article supplement (doi:10.5194/egusphere-2025-1614), 2025-05-26
Supplement: Supplementary file 1 [file egusphere-2025-1614-supplement.pdf]

# Understanding the Gangotri glacier dynamics: Implications from a fully distributed inversion of equivalent water-volume change

## Supplementary dataset

Anikul Islam<sup>1\*</sup>, Divyesh Varade<sup>1</sup>, Aliva Nanda<sup>2</sup>, Somil Swarnkar<sup>3</sup>, Rajiv Sinha<sup>4</sup>

<sup>1.</sup> Department of Civil Engineering, Indian Institute of Technology, Jammu, India

<sup>2.</sup> School of Civil and Environmental Engineering, Indian Institute of Technology, Mandi, India

<sup>3.</sup> Department of Earth and Environmental Sciences, Indian Institute of Science, Education & Research, Bhopal, India

<sup>4.</sup> Department of Earth Sciences, Indian Institute of Technology Kanpur, India

\* Corresponding author(s)<sup>1</sup> and emails: [2024rce2034@iitjammu.ac.in](mailto:2024rce2034@iitjammu.ac.in)

**Table S1:** Dataset used for COSI Corr and ImGRAFT toolbox

| Pairs | Data       | Master image | Slave image | Time baseline (days) |
|-------|------------|--------------|-------------|----------------------|
| 1     | Sentinel-2 | 2016.09.19   | 2017.08.15  | 331                  |
| 2     | Sentinel-2 | 2017.08.15   | 2018.08.09  | 359                  |
| 3     | Sentinel-2 | 2018.08.09   | 2019.09.14  | 400                  |
| 4     | Sentinel-2 | 2019.09.14   | 2020.10.08  | 342                  |
| 5     | Sentinel-2 | 2020.10.08   | 2021.10.13  | 370                  |
| 6     | Sentinel-2 | 2021.10.13   | 2022.10.28  | 351                  |
| 7     | Sentinel-2 | 2022.10.28   | 2023.10.28  | 365                  |

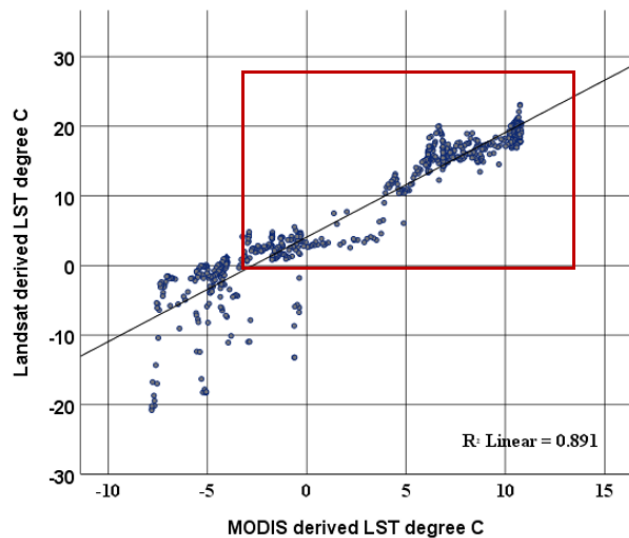

17 **Figure S1:** Correlation between MODIS derived and Landsat derived LST of Gangotri glacier for  
 18 assessment the accuracy of the MODIS coarse dataset  
 19

20 **Table S2:** Correlation between MODIS (2022) derived and Landsat (2022) derived LST of Gangotri

|                        |                     | Landsat derived LST | MODIS LST |
|------------------------|---------------------|---------------------|-----------|
| Landsat<br>derived LST | Pearson Correlation | 1                   | .944**    |
|                        | Sig. (2-tailed)     |                     | .000      |
|                        | N                   | 682                 | 682       |
| MODIS LST<br>daytime   | Pearson Correlation | .944**              | 1         |
|                        | Sig. (2-tailed)     | .000                |           |
|                        | N                   | 682                 | 682       |

21 Supplementary text

22 **1. Arrhenius creep factor estimation:**

23 
$$A_c = A_c^* \exp\left(\frac{Q_c}{R} \left[\frac{1}{T} - \frac{1}{T^*}\right]\right)$$

24 where the constants being  $A_c^* = 2.4 \cdot 10^{-24}$ ,  $Q_c = 115 \text{ kJ mol}^{-1}$ ,  $R \approx 0.0083145$  (the ideal gas  
 25 constant), and  $T^* = 273 \text{ K}$ ,  $T$  is estimated land surface temperature (LST).  
 26

27 **Table S3:** Estimated Arrhenius creep factor

| Year | Min LST<br>(°C) | Max. LST<br>(°C) | Min LST<br>(Kelvin) | Max LST<br>(Kelvin) | Arrhenius creep<br>factor |
|------|-----------------|------------------|---------------------|---------------------|---------------------------|
| 2016 | -18.54          | 11.27            | 254.61              | 284.42              | 1.553e-23                 |
| 2017 | -18.46          | 10.48            | 254.69              | 283.63              | 1.576e-23                 |
| 2018 | -20.02          | 9.77             | 253.13              | 282.92              | 2.112e-23                 |
| 2019 | -19.82          | 8.13             | 253.33              | 281.28              | 2.162e-23                 |
| 2020 | -19.52          | 9.97             | 253.63              | 283.12              | 1.920e-23                 |
| 2021 | -18.90          | 9.56             | 254.25              | 282.71              | 1.760e-23                 |
| 2022 | -17.61          | 13.05            | 255.54              | 286.2               | 1.256e-23                 |
| 2023 | -17.62          | 12.06            | 255.53              | 285.21              | 1.296e-23                 |
| Mean | -18.81          | 10.50            | 254.82              | 283.65              | 1.526e-23                 |

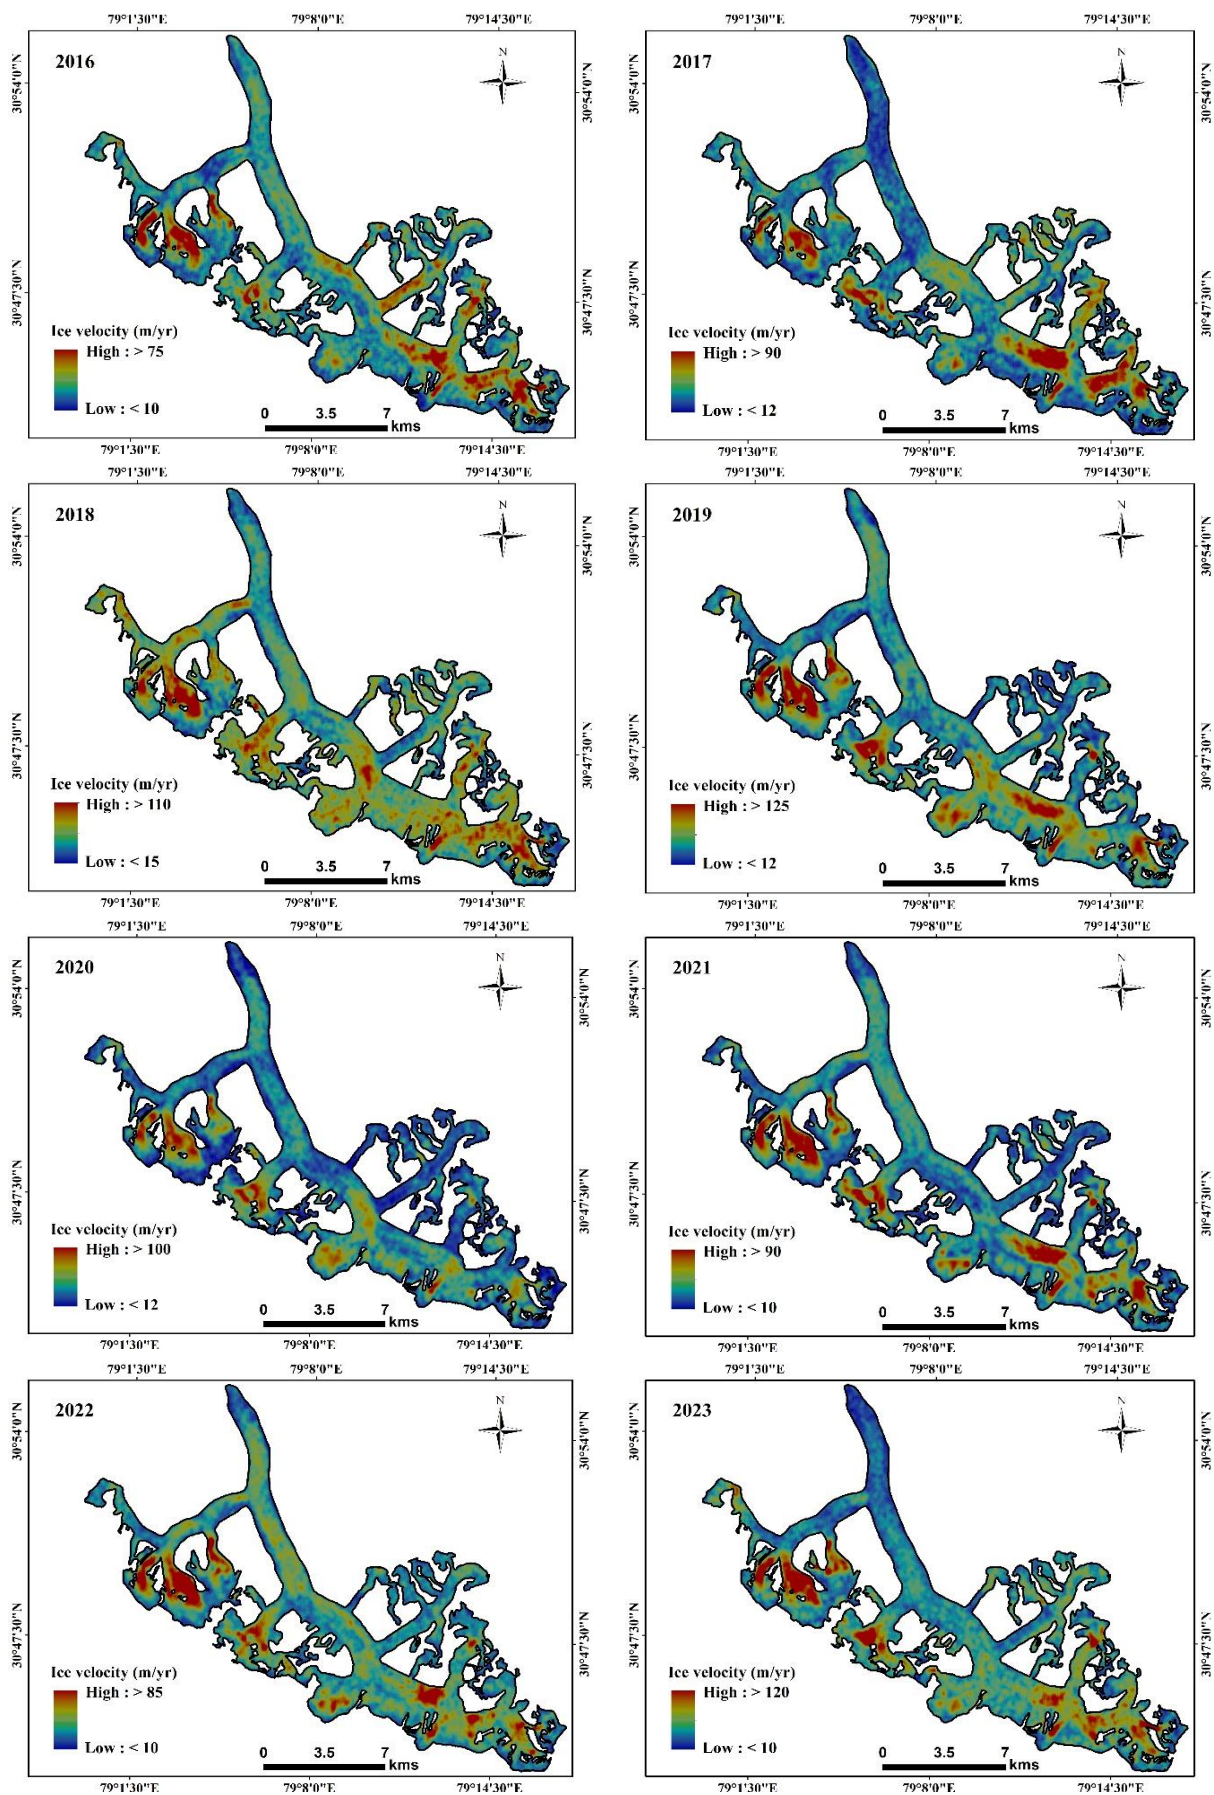

29 **Figure S2:** GIV derived velocity map 2016 to 2023

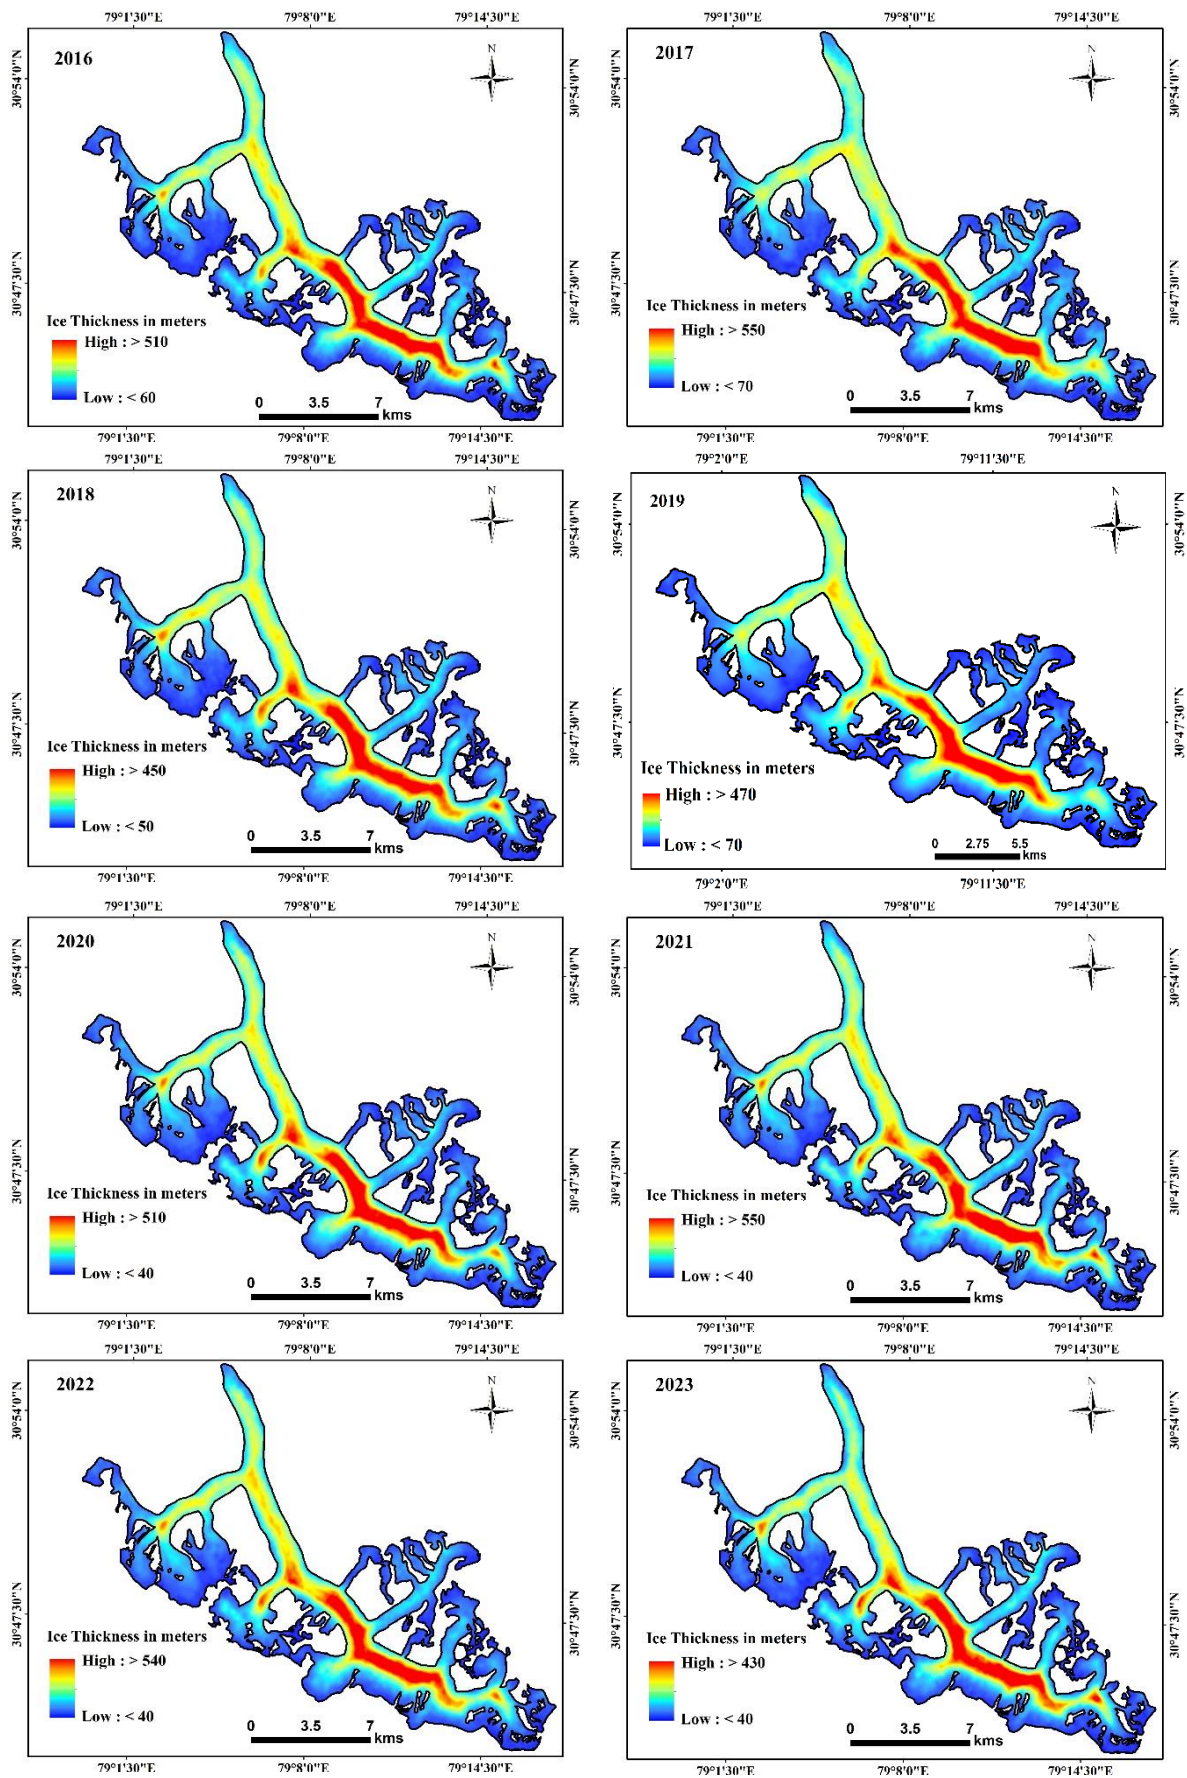

30 **Figure S3:** 2016 to 2023 thickness based on VWDV model

31

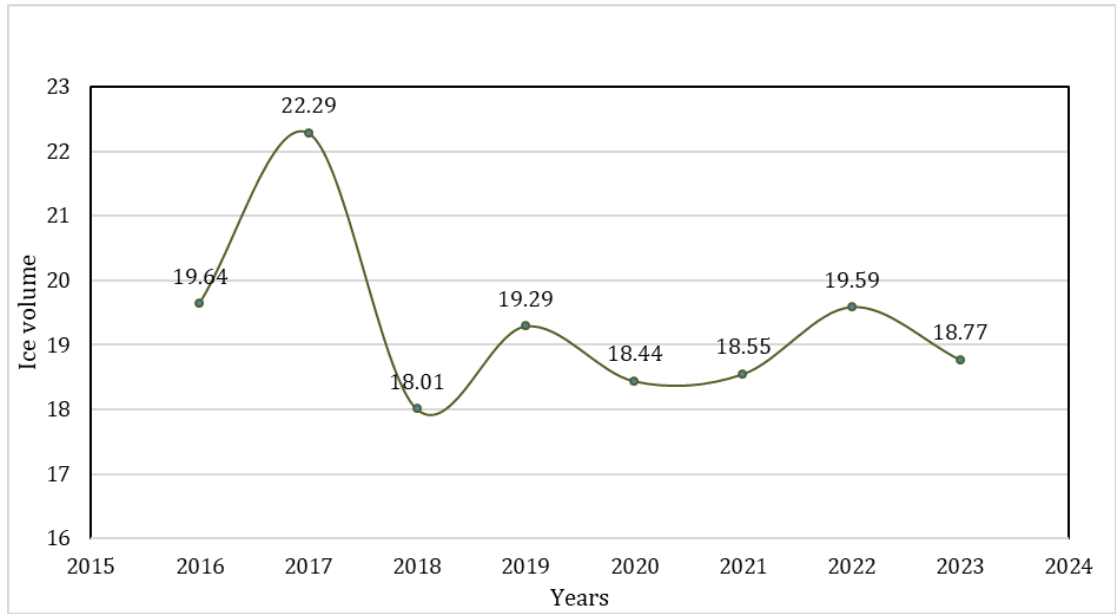

32

33

34

**Figure S4:** Ice volume (km<sup>3</sup>) estimated by modified area of the glacier (area\*thickness)



## 2. Comparative assessment of the Glaciological mass balance Garhwal Himalaya glaciers:

In Garhwal Himalaya, four glaciers; Dunagiri, Tipra Bank, Chorabari, and Dokriani were surveyed for their annual mass balances (Azam et al., 2018).

It includes annual mass balance estimates covering different observation periods for each glacier, along with their correlations with temperature and precipitation anomalies. Tipra Bank Glacier exhibited near-equilibrium conditions with a mean annual mass balance of  $-0.14 \text{ m w.e. a}^{-1}$  from 1981 to 1988, whereas Dunagiri Glacier experienced significant mass loss, averaging  $-1.04 \text{ m w.e. a}^{-1}$  between 1984 and 1990. Dokriani Glacier recorded mass balance values of  $-0.25 \text{ m w.e. a}^{-1}$  from 1992 to 1995 and  $-0.39 \text{ m w.e. a}^{-1}$  from 1997 to 2000, while Chorabari Glacier exhibited an annual mass balance of  $-0.73 \text{ m w.e. a}^{-1}$  during 2003–2010.

Comparing these values with Gangotri Glacier, which has a mean annual mass balance of  $-1.01 \pm 0.403 \text{ m w.e. a}^{-1}$ , highlights the impact of extensive debris cover (Yousuf et al., 2025), particularly in the ablation zone. The presence of thick debris cover significantly influences melt rates, leading to heterogeneous mass loss patterns. While Tipra Bank and Dunagiri glaciers exhibited a strong correlation ( $r^2 = 0.75$ ) over 1985–1988, indicating similar climatic responses, the high mass wastage observed in Gangotri Glacier suggests additional controlling factors beyond climate alone.

**Table S4:** Glaciological Mass Balance Measurements in the Garhwal Himalaya (Azam et al., 2018).

| Glacier name      | Location           | Area (km <sup>2</sup> ) | Aspect | MB Period                | Mass balance (m w.e. yr <sup>-1</sup> ) | Reference             |
|-------------------|--------------------|-------------------------|--------|--------------------------|-----------------------------------------|-----------------------|
| 1. Chorabari (CB) | 30°74'N<br>79°09'E | 6.7                     | S      | 2003-2010                | -0.73                                   | Dobhal et al., (2013) |
| 2. Dokriani (DR)  | 30°50'N<br>78°50'E | 7.0                     | NW     | 1992-1995;<br>1997-2000; | -0.32                                   | Dobhal et al., (2013) |
| 3. Dunagiri (DG)  | 30°33'N<br>79°54'E | 2.6                     | N      | 1984-1990                | -1.04                                   | GSI (1991)            |

55  
56  
57

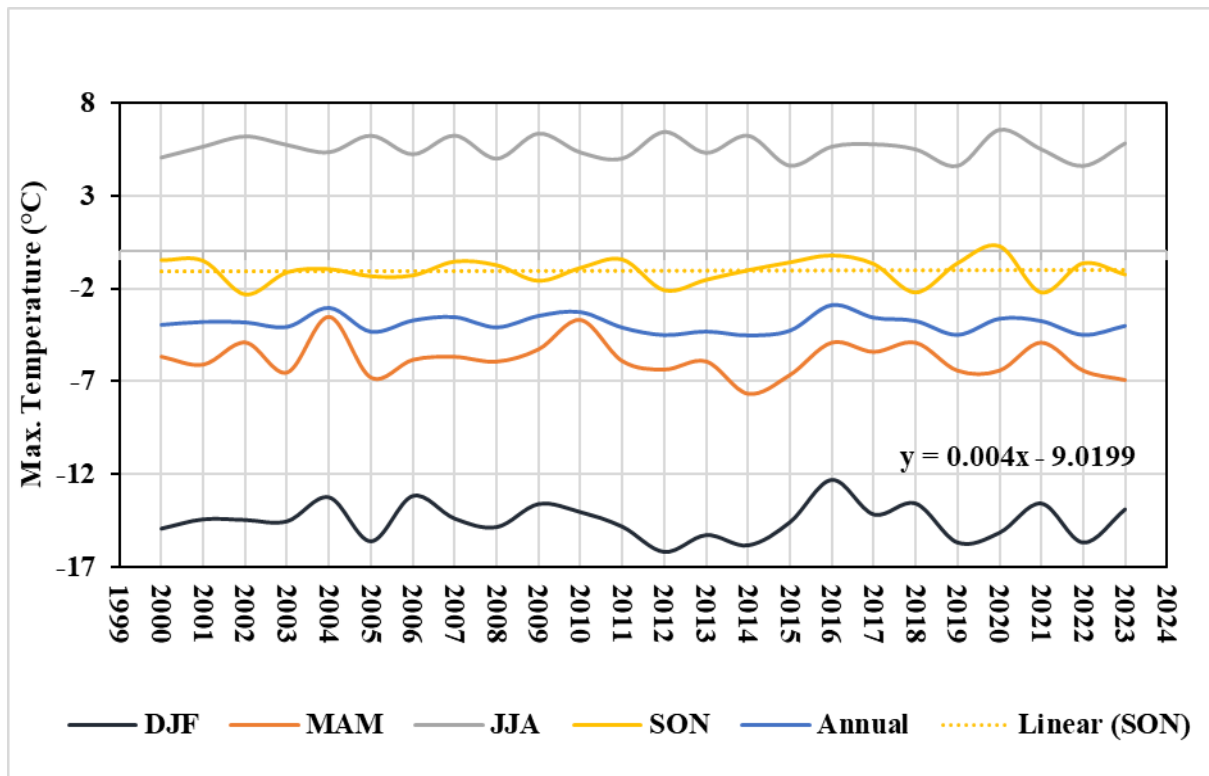

58  
59  
60  
61  
62

**Figure S5:** Graph showing the trend of seasonal maximum temperature of the Gangotri glacier

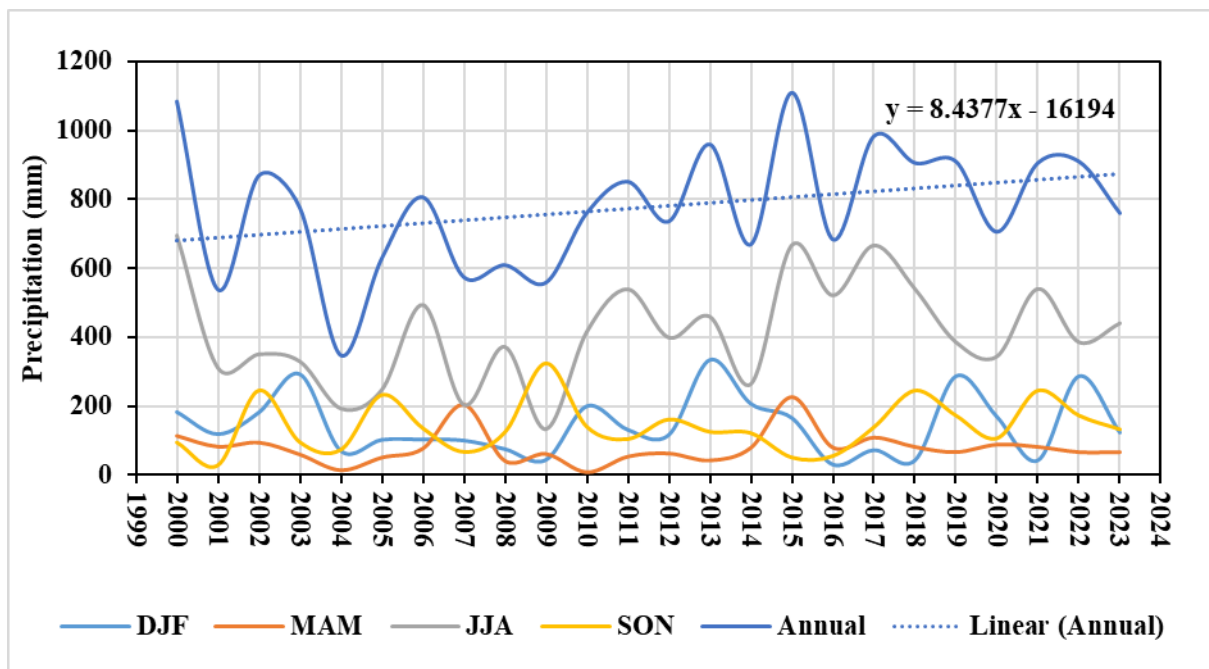

63  
64  
65  
66

**Figure S6:** Graph showing the trend of seasonal and annual precipitation of the Gangotri glacier

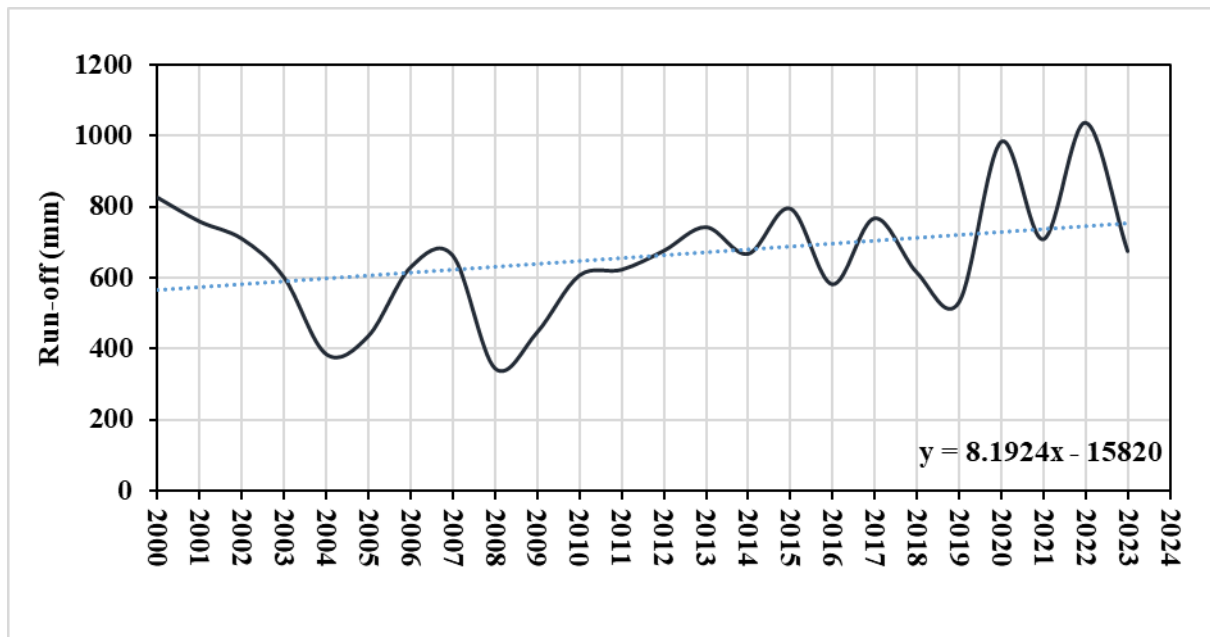

**Figure S7:** Graph showing the total runoff trend of the Gangotri glacier of the month of May-June-July-August-September

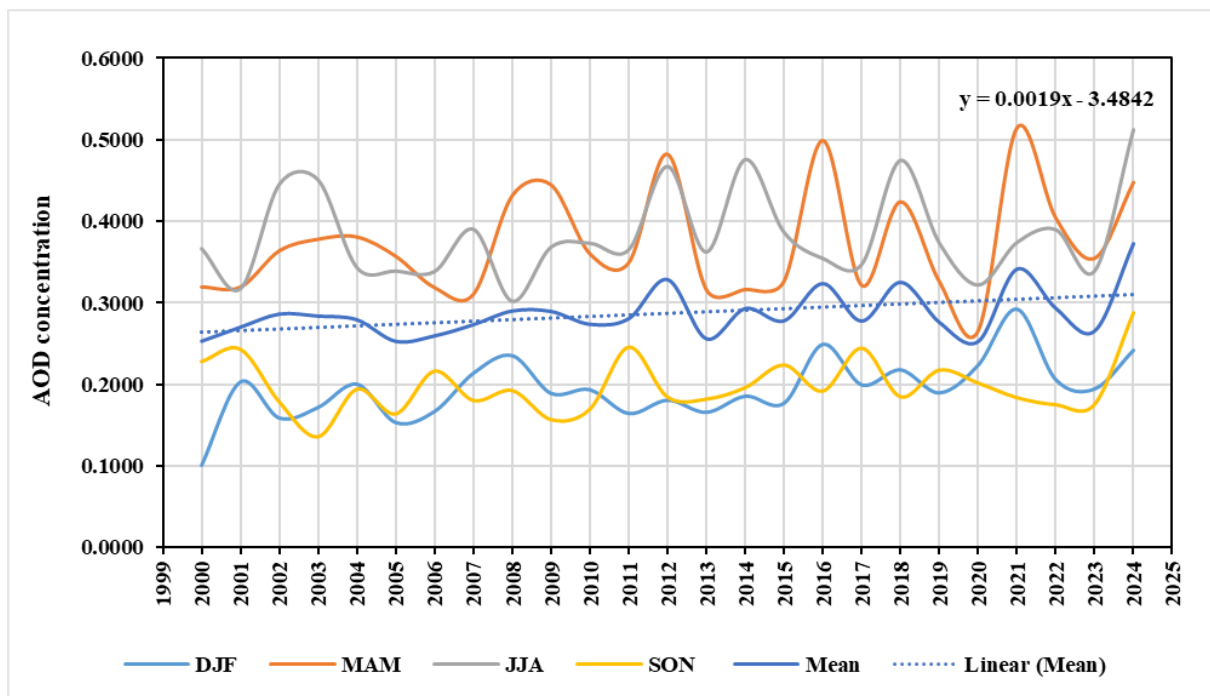

**Figure S8:** Graph showing the seasonal Aerosol Optical Depth (AOD) concentration in Uttarakhand state



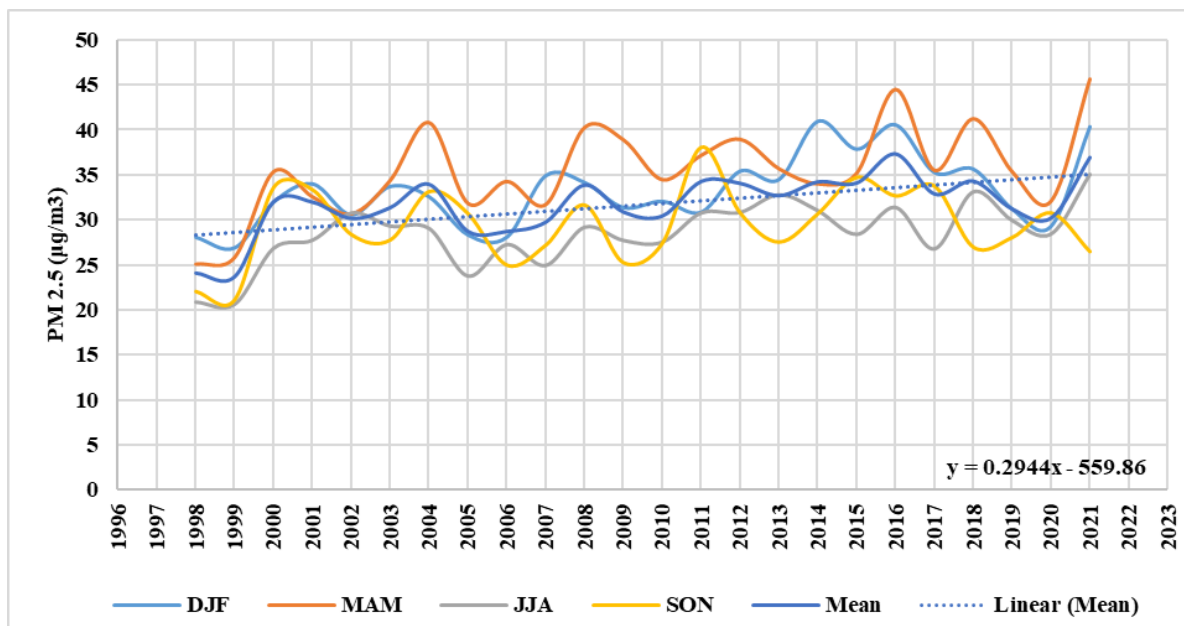

**Figure S9:** Graph showing the seasonal PM 2.5 concentrations in Uttarakhand state

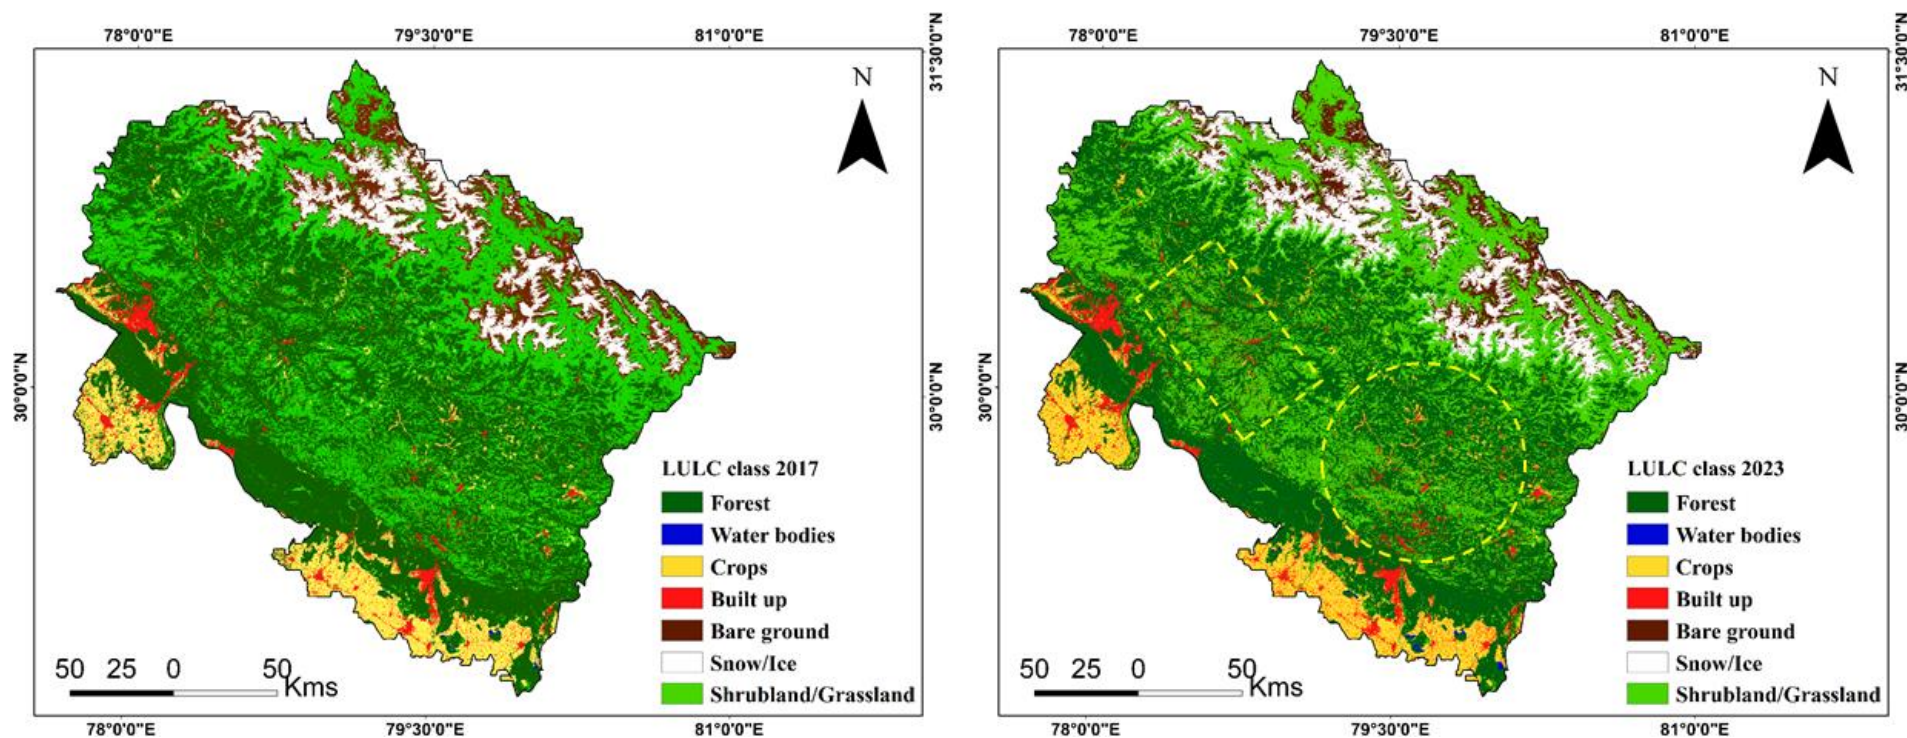

**Figure S10:** Land Use Land Cover (LULC) changes in Uttarakhand state from 2017 to 2023, derived from Sentinel-2 data. The results indicate a significant increase in built-up areas, while deforestation is also observed.

## References

- Azam, M. F., Wagnon, P., Berthier, E., Vincent, C., Fujita, K., & Kargel, J. S. (2018). Review of the status and mass changes of Himalayan-Karakoram glaciers. *Journal of Glaciology*, 64(243), 61–74. <https://doi.org/10.1017/jog.2017.86>
- Dobhal, D. P., Mehta, M., & Srivastava, D. (2013). Influence of debris cover on terminus retreat and mass changes of Chorabari Glacier, Garhwal region, central Himalaya, India. *Journal of Glaciology*, 59(217), 961–971. <https://doi.org/10.3189/2013JoG12J180>
- Yousuf, B., Shukla, A., Garg, S., & Bangroo, S. A. (2025). Cryokarst–induced dynamics of the Gangotri glacier, central Himalaya. *Geomorphology*, 478, 109711. <https://doi.org/10.1016/j.geomorph.2025.109711>
- GSI (Geological Survey of India) (1991) Annual general report, Part 8. Volume 124
